# Supplementary material for: Linking surveillance and clinical data for evaluating trends in bloodstream infection rates in neonatal units in England
Source: PubMed Central journal article supplement (PMC6907823; doi:10.1371/journal.pone.0226040), 2019-12-12
Supplement: pone.0226040.s004.pdf [file pone.0226040.s004.pdf]

### 1) Deterministic linkage (singletons + multiple births)

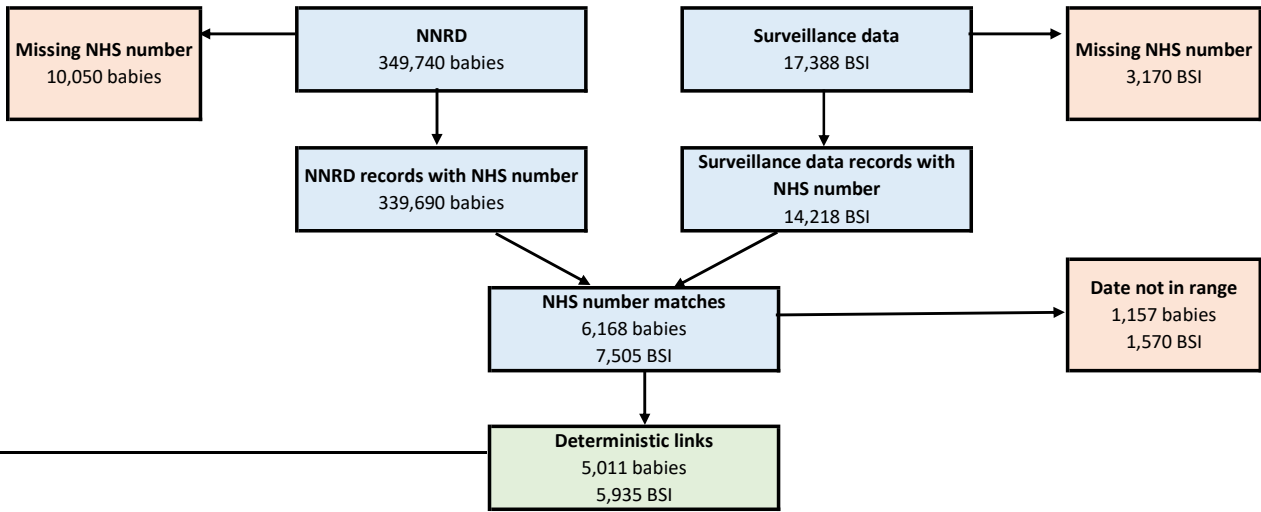

### 2) Probabilistic linkage (singletons)

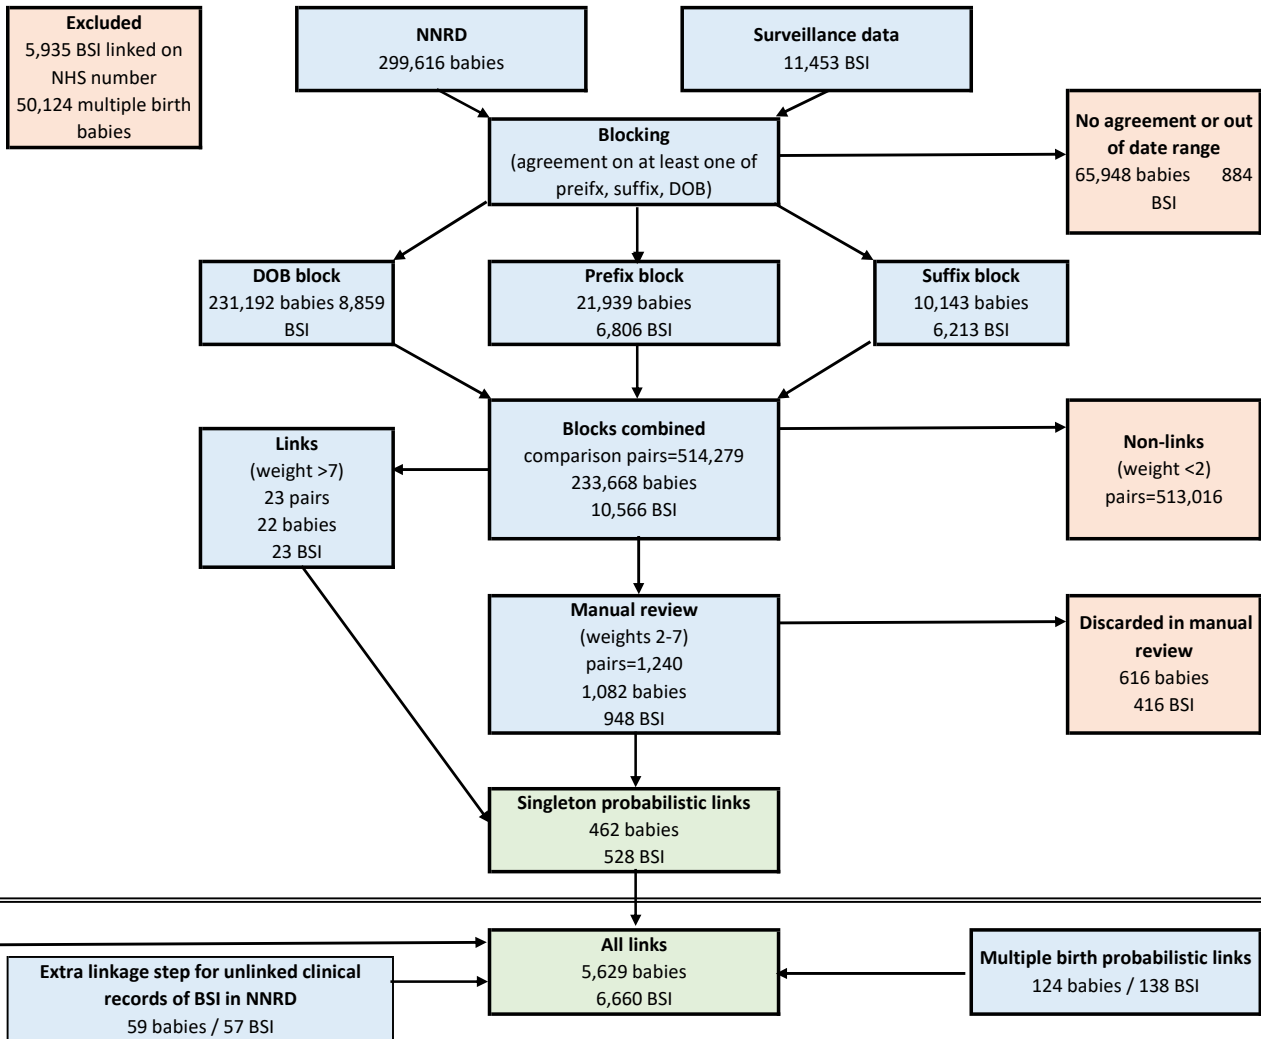

Date in range = Specimen date between 7 days before discharge and 14 days after admission
